# The role of dopaminergic nuclei in predicting and experiencing gains and losses: A 7T human fMRI study

Laura Fontanesi, Sebastian Gluth, Jörg Rieskamp\*  
University of Basel

Birte U. Forstmann\*  
University of Amsterdam

\*shared senior authorship

## Abstract

The ability to predict the outcomes of actions based on experience is crucial for making successful decisions in new or dynamic environments. In animal studies using electrophysiology, it was found that dopamine neurons, located in the substantia nigra (SN) and the ventral tegmental area (VTA), have a crucial role in feedback-based learning. However, human neuroimaging studies have provided inconclusive results. The present work used ultra-high field (7 Tesla) structural and functional MRI and optimized protocols to extract SN and VTA signals in human participants. In a number-guessing task, we found significant correlations with reward prediction error and risk in both the SN and the VTA and no correlation with expected value. We also found a surprise signal in the SN. These results are in line with a recent framework that proposed a differential role for the VTA and the SN in, respectively, learning of values and surprise.

*Keywords:* reward, punishment, midbrain, substantia nigra, ventral tegmental area

---

This research is supported by the Swiss National Science Foundation (mobility grant number P1BSP1\_172017), the Department of Psychology of the University of Amsterdam, the Netherlands Organisation for Scientific Research (project number 14017), and an ERC grant from the European Research Council (B.U.F.).

Correspondence concerning this article should be addressed to Laura Fontanesi, Center for Economic Psychology, Department of Psychology, University of Basel, Missionsstrasse 62a, 4055, Basel, Switzerland. Email: [laura.fontanesi@unibas.ch](mailto:laura.fontanesi@unibas.ch)

The behavioral, functional and structural MRI data are available at <https://osf.io/4vjta/>.

1

## Introduction

2 In order to adapt to an ever-changing environment, it is crucial for individuals to  
3 correctly predict the outcomes of their choices, as well as to update their expectations when  
4 they happen to be wrong. These learning processes were formalized within the reinforcement  
5 learning (RL) framework (Sutton & Barto, 1998), unifying the fields of psychology and  
6 artificial intelligence. In this framework, the reward prediction error (RPE) is defined as  
7 the difference between the expectations and the experienced rewards or punishments, and  
8 guides learning: New expectations are a weighted sum of past expectations and the RPE. By  
9 presenting participants in the lab with different options and providing feedback after every  
10 decision, psychologists and neuroscientists can investigate the cognitive processes related to  
11 *expectations* and *feedback processing*. Expectations can be separated into the expected value  
12 (EV), which can be defined as the mean expected outcome, and risk, which is often defined  
13 as the expected variance of the outcomes (Markowitz, 1952). Feedback-related processes  
14 are the deviation from previous expectations (i.e., the RPE) and the salience of the outcome  
15 (i.e., surprise, see Methods section).

16 A highly distributed network related to expectations and feedback processing was  
17 found in both the animal and the human brain. Electrophysiological studies in rodents and  
18 non-human primates showed that midbrain dopaminergic neurons (i.e., in the substantia  
19 nigra, SN – specifically in its pars compacta, SNc – and in the ventral tegmental area,  
20 VTA) fire more, equal, or less in association with a positive, zero, or negative RPE (Bayer  
21 & Glimcher, 2005; Schultz, 1998, 2015), respectively, and their firing ramps up faster with  
22 increasing risk expectations (Fiorillo, Tobler, & Schultz, 2003). Firing of cells in the SNc has  
23 also been associated with surprise (Matsumoto & Hikosaka, 2009). Because dopamine nuclei  
24 are more challenging to target using non-invasive neuroimaging techniques, studies using  
25 human participants mainly focused on dopamine target areas (Arias-Carrión, Stamelou,  
26 Murillo-Rodríguez, Menéndez-González, & Pöppel, 2010). Neural correlates of the RPE  
27 have been found in the ventral striatum and an expected reward signal has been found in  
28 ventral striatum, amygdala, as well as in frontal areas such as the orbital frontal cortex and  
29 the ventromedial prefrontal cortex (for an overview see, e.g., Bartra, McGuire, & Kable,  
30 2013; Clithero & Rangel, 2014; O’Doherty & Bossaerts, 2008). Both ventral striatum and  
31 anterior insula were found to signal predicted risk and surprise (Fouragnan, Retzler, &  
32 Philiastides, 2018; Preusschoff, Bossaerts, & Quartz, 2006; Singer, Critchley, & Preusschoff,  
33 2009).

34 The measurement of small dopaminergic nuclei signaling using fMRI is very chal-  
35 lenging. One challenge pertains to the higher concentration of iron in the SN (Drayer et  
36 al., 1986). This high concentration causes differences in the magnetic properties of the SN  
37 compared to, for example, cortical areas, and asks for customized structural and functional  
38 MRI scanning protocols (e.g., reduced echo times). Another problem is physiological noise  
39 affecting the fMRI data due to the proximity of these areas to major arteries and cere-  
40 brospinal fluid. Finally, their limited volume and distance from the receiving elements of  
41 the scanner, combined with anatomical variability and standard procedures such as spa-  
42 tial smoothing, lead to a high risk of mixing signals from neighboring nuclei (de Hollander,  
43 Keuken, & Forstmann, 2015; de Hollander, Keuken, van der Zwaag, Forstmann, & Trampel,  
44 2017; Eapen, Zald, Gatenby, Ding, & Gore, 2011; Forstmann, de Hollander, van Maanen,

45 Alkemade, & Keuken, 2017).

46 Because of these challenges, only very few neuroimaging studies have directly mea-  
47 sured activation of small dopaminergic nuclei in human participants. Furthermore, these  
48 studies reported contradicting evidence. D'Ardenne, McClure, Nystrom, and Cohen (2008)  
49 found positive but not negative RPE in the VTA. Pauli et al. (2015) found only a positive  
50 RPE in the SNc, a negative RPE in the pars reticulata of the SN (SNr), as well as a neg-  
51 ative expected value signal in the SNr. Zhang, Larcher, Misic, and Dagher (2017) found  
52 that, while the medial part of the SN encoded RPE, the lateral and ventral parts encoded  
53 surprise.

54 To the best of our knowledge, previous studies with human subjects (1) have not  
55 compared the signal of the VTA and the SN (except D'Ardenne et al. (2008)), (2) have  
56 not looked at the variables related to expectations and feedback processing altogether (i.e.,  
57 they did not always include EV, risk, RPE, and surprise); (3) have not addressed the above-  
58 mentioned fMRI-specific challenges. In particular, previous studies have used high-field 3  
59 Tesla (3T) MRI, spatial smoothing, and did not draw individual masks to delineate the  
60 VTA or the SN, but relied instead on group-based coordinates or atlases.

61 Ultra-high-field (UHF) 7 Tesla (7T) MRI can help to increase signal-to-noise ratio  
62 (SNR) and BOLD contrast-to-noise ratio (CNR), leading to a more refined spatial resolution  
63 without loss of power or need for spatial smoothing (van der Zwaag, Schäfer, Marques,  
64 Turner, & Trampel, 2015). In the present study, we used UHF-fMRI in combination with  
65 scanning protocols tailored to extract signals from subject-specific masks of the midbrain  
66 to overcome some of the previous limitations and clarify the findings of previous studies,  
67 especially regarding the function of the VTA and the SN (Trutti, Mulder, Hommel, &  
68 Forstmann, 2019). By adapting the number-guessing paradigm proposed by Preuschoff et  
69 al. (2006), we also investigated important variables such as risk and surprise, as well as EV  
70 and RPE, thereby targeting processes of both expectation and feedback processing.

71

## Results

72 To investigate the role of the VTA and the SN in expectation and feedback processing,  
73 we tested participants in a number-guessing task (Figure 1) in a MRI session. In this task,  
74 there are three main events per trial. First, participants have to predict whether the first  
75 or the second of two numbers (between 1 and 5) will be higher: this prediction corresponds  
76 to their initial bet, as if the prediction is correct they will win 5 euros and if the prediction  
77 is incorrect they will lose 5 euros. Then, they are shown the first of the two numbers,  
78 which changes the EV and risk of the choice options. Finally, participants are shown  
79 the second number, together with the reward, which is associated with a specific RPE and  
80 surprise, depending on the initial bet and on the first number. Participants were also invited  
81 to a separate MRI session, in which multimodal, high-resolution anatomical images were  
82 acquired (Figure 2). This procedure allowed us to identify the region of interests (ROIs)  
83 at an individual level and to then extract the signal from each ROI to test for correlations  
84 with EV, risk, RPE, and surprise.

85 In the following sections, we report the behavioral results of the card-guessing task,  
86 the results of the anatomical segmentation of the ROIs, the fMRI analyses results limited  
87 to the ROIs, as well as across the whole brain.

88 **Behavior**

89 To check whether participants were engaged in the task, we introduced test trials in  
90 which, instead of revealing their reward, participants had to say whether they won or lost  
91 in that specific trial. This was only possible if they still remembered the first number and  
92 their initial bet. Three blocks (from three different participants) were discarded based on  
93 behavior: One block was discarded because three out of the five test trials were incorrect,  
94 and the other two blocks were discarded because twelve out of sixty missed bets.

95 In the remaining blocks, and over the two blocks (i.e., 120 total trials), participants  
96 made on average 1.0 mistakes (SD=1.05, min=0, max=4), missed on average 4.48 tri-  
97 als (SD=3.65, min=0, max=12), and chose on average the right option on 57.81 trials  
98 (SD=13.75, min=21, max=88).

99 **Anatomical masks**

100 To measure the inter-rater reliability of the individual SN and VTA segmentation, we  
101 calculated Dice Scores (see Table 1). In general, higher scores were obtained for the SN as  
102 compared to the VTA. This is not surprising, because Dice scores are sensitive to overall  
103 size (the SN is approximately 3.7 times bigger than the VTA), and because the VTA lacks  
104 clear anatomical borders. By only keeping those voxels that both raters agreed on (i.e., the  
105 conjunction masks), we ensured that the voxels included in the analyses lie exclusively in  
106 the investigated ROIs.

107 In addition to the Dice scores, we also calculated the percentage of overlap between  
108 our individual conjunction masks and previously proposed group-level subdivisions of the  
109 SN and the VTA <sup>1</sup> (Pauli, Nili, & Tyszka, 2018; Zhang et al., 2017), transformed to the  
110 individual space (see Figure 3). This measure gives an idea of how much signal from the  
111 neighbouring nuclei is mixed with the signal of the targeted structure when using population-  
112 based instead of individual masks. This measure does not include further mixing of the  
113 signal due to techniques such as spatial smoothing (which may further increase this measure).  
114 We found significant overlap between the medial parts of the SN of the group-level subdivi-  
115 sions and our individual VTA masks. Specifically, there was a mean overlap of 7.23 percent  
116 (SD=10.14, min=0.00, max=34.58,  $t(53)=5.19$ ,  $p<0.001$ ) with the medial part of the SNc  
117 (mSNc), and a mean overlap of 1.3 percent (SD=2.14, min=0.00, max=8.36,  $t(53)=4.41$ ,  
118  $p<0.001$ ) with the lateral part of the SNc (lSNc) as defined by Zhang et al. (2017); and  
119 a mean overlap of 1.56 percent (SD=2.21, min=0.00, max=11.93,  $t(53)=5.13$ ,  $p<0.001$ )  
120 with the SNc as defined by Pauli et al. (2018). We also found a significant overlap be-  
121 tween Pauli et al. (2018)'s subdivisions of the VTA (i.e., labelled VTA and the parabrachial  
122 pigmented area or PBP, where VTA denotes the more medial and PBP denotes the more  
123 lateral part) and our individual SN masks. Specifically, there was a mean overlap of 7.76  
124 percent (SD=9.81, min=0.00, max=58.76,  $t(53)=5.76$ ,  $p<0.001$ ) with Pauli et al. (2018)'s  
125 VTA and a mean overlap of 8.81 percent (SD=6.47, min=0.00, max=25.76,  $t(53)=9.91$ ,  
126  $p<0.001$ ) with Pauli et al. (2018)'s PBP.

127 To gain better insight into the anatomical specificity of the SN and VTA, we plotted  
128 Pauli et al. (2018)'s and Zhang et al. (2017)'s subdivisions of the SN and the VTA on  
129 the individual data using different contrasts: Figure S1, S2, and S3 show, respectively,

<sup>1</sup>Defined as the ratio between the number of voxels in common and the number of voxels in the subdivision.

130 a comparison between Pauli et al. (2018)'s atlas with our probabilistic VTA and SN maps  
131 in the MNI space, a comparison between Zhang et al. (2017)'s atlas with our probabilistic  
132 VTA and SN maps in the MNI space, and a comparison between Pauli et al. (2018)'s and  
133 Pauli et al. (2018)'s atlases in the individual space of one example subject. Although the  
134 group-level masks appear to be accurate to some extent, they often include neighbouring  
135 areas (such as the red nucleus, see the top left quadrant in Figure S3) or exclude parts of  
136 the targeted areas (such as in the lower right quadrant in Figure S3). Therefore, only by  
137 drawing individual masks and avoiding spatial smoothing, we can be sure to not mix signals  
138 from different midbrain nuclei.

139 Finally, we calculated the temporal signal-to-noise (tSNR) across the ROIs (see Fig-  
140 ure S4). The tSNR was lower, yet comparable to the one reported by de Hollander et al.  
141 (2017).

## 142 ROI-wise GLM

143 For the functional analyses, two blocks of trials (from two different participants) were  
144 discarded based on excessive head movements, having a mean framewise displacement (FD,  
145 Power et al., 2014) over .3 mm. Because one of these blocks was already discarded based  
146 on behavior, a total of four blocks was excluded from the final analyses. In the remaining  
147 blocks, and over the two blocks, participants had an average mean FD of .14 mm (SD=.06,  
148 min=.04, max=.27).

149 Results of the ROI-wise GLM are shown in Table 2 and Figure 4. First, we investi-  
150 gated the signal related to expectations (i.e., EV and risk) in both the SN and the VTA,  
151 corresponding to the presentation of the first number. We found no parametric correlations  
152 between signal in any of the ROI with the EV, with the Bayes Factor (BF) pointing to sub-  
153 stantial (Jeffreys, 1961) evidence for the null hypothesis. However, there were significant  
154 correlations with risk in both the left-VTA ( $t(26)=-2.34$ ,  $p<0.05$ ) and the left-SN ( $t(26)=-$   
155  $2.44$ ,  $p<0.05$ ). Next, we investigated the signal related to feedback processing (i.e., RPE and  
156 surprise), corresponding to the presentation of the second number. There were significant  
157 correlations with RPE in the left- and right-VTA ( $t(26)=3.12$ ,  $p<0.05$ , and  $t(26)=2.76$ ,  
158  $p<0.05$ ) and in the right-SN ( $t(26)=2.54$ ,  $p<0.05$ ). Finally, we found a correlation with  
159 surprise in the right-SN ( $t(26)=2.32$ ,  $p<0.05$ ), and no effect in the VTA, with the BF pro-  
160 viding substantial support for the null hypothesis. In sum, both the VTA and the SN were  
161 linked to risk before the outcome was revealed as well as to RPE after the outcome was  
162 revealed. These results confirm previous findings from Fiorillo et al. (2003) regarding the  
163 role of dopamine neurons in risk processing and previous findings from, e.g., Schultz (1998)  
164 regarding the role of dopamine neurons in RPE processing, but not regarding a possible  
165 role of these nuclei also in EV processing. Only the SN was additionally associated with  
166 outcome surprise, similarly to Matsumoto and Hikosaka (2009). As a control analysis (see  
167 Table S2), we also fit a GLM using the design of Preusschoff et al. (2006). In particular,  
168 we fit separate regressors for the first and second epoch after presenting the first number  
169 (where the first epoch lasted 1 second and the second epoch lasted 3 seconds). In these  
170 analyses, we found significant correlation with risk (in both epochs) and RPE across both  
171 the SN and the VTA. However, contrary to the results of our primary analysis, we also  
172 found significant correlation with EV in the second epoch with right-SN and left-VTA and  
173 no significant correlation with surprise. Note, however, that the high correlation between

174 regressors in the first and second epochs (see Figure S5) might limit the sensitivity of our  
175 analysis given our particular task.

### 176 **Voxel-wise GLM**

177 To explore other sub-cortical and cortical correlates of expectation- and feedback-  
178 related processes, we fit the same GLM on the whole-brain level. The results are shown in  
179 Table 3 and Figure 5 (see also Table S1 for automatic labeling based on cluster peak coordi-  
180 nates). After cluster correction, we found positive correlations with EV in the ventromedial  
181 prefrontal cortex, frontal pole, ventral striatum, and precuneus cortex, and negative cor-  
182 relations with EV in the thalamus. We found positive correlations with risk in the middle  
183 temporal gyrus and posterior insula, and negative correlations with risk in orbital frontal  
184 cortex, frontal lobe, and anterior insula. We found positive correlations with RPE in ventral  
185 striatum, orbital frontal cortex, midbrain, precuneus and anterior insula, and no negative  
186 correlations with RPE. Finally, we found positive correlations with surprise in the orbital  
187 frontal cortex, inferior frontal gyrus, superior temporal gyrus, and middle temporal gyrus,  
188 and negative correlations with surprise in precuneus and posterior insula. Even though  
189 we could not test for temporal differentiation in the anticipatory period (due to identifi-  
190 ability issues, see above), we could observe a spatial differentiation between EV and risk,  
191 confirming parts of the results from Preuschoff et al. (2006). We also observed a spatial  
192 differentiation between RPE and surprise.

### 193 **Discussion**

194 Understanding the dopamine circuit is of great importance for both clinical and cog-  
195 nitive neuroscience. First of all, the loss of dopaminergic neurons is associated with Parkin-  
196 son's disease symptoms (Fearnley & Lees, 1991; Frank, 2006a) and dysregulations in the  
197 human dopamine circuit are known to play a role in drug addiction (Everitt & Robbins,  
198 2005) and pathological gambling (Bergh, Eklund, Södersten, & Nordin, 1997). Moreover,  
199 the dopamine signal reflects different aspects of rewards, including the anticipation of risk  
200 and the mismatch between predictions and outcomes (Schultz, 2015). While dopamine neu-  
201 rons are situated mostly in the midbrain, they are part of a much greater and complex  
202 circuit, involving different cortical and subcortical areas (Frank, 2006b; Haber & Knutson,  
203 2010; Watabe-Uchida, Eshel, & Uchida, 2017). By transmitting information about changes  
204 in reward expectations and risk in the environment to areas important for action execution  
205 and learning, dopamine likely plays a crucial role in adaptive behavior, that is, for survival  
206 in a dynamic environment, with limited resources and obstacles to avoid.

207 To date, most human studies have focused on the target areas (both cortical and  
208 subcortical) of the dopamine neurons because of methodological challenges. An exception  
209 was the study of Zaghoul et al. (2009): Using microelectrode recordings during deep brain  
210 stimulation surgery in Parkinson's disease patients, they found SN activation in line with the  
211 RPE. Importantly, human studies that investigated the activity of dopamine nuclei using  
212 fMRI provided incomplete and partially contradicting results. In this paper, we presented  
213 the results of a 7T fMRI study involving human participants performing a number-guessing  
214 task. To the best of our knowledge, this was the first study to investigate the functional  
215 role of both the VTA and the SN using UHF-MRI to acquire high-quality, high-resolution

216 functional and structural images. While previous studies in these areas focused on expected  
217 gains or losses and on the RPE signals, we extended the analysis to expected risk and to  
218 surprise. This was based on previous electrophysiological and fMRI studies that either  
219 found this signal in the VTA/SN or in their target areas (e.g., Fiorillo et al., 2003; Hayden,  
220 Heilbronner, Pearson, & Platt, 2011; Preuschoff et al., 2006). While we found no evidence  
221 for a linear correlation between reward anticipation (involving both gains and losses) and  
222 VTA or SN activation, we did find evidence for a RPE signal in both regions, as well as for  
223 expected risk signal. Similarly to Matsumoto and Hikosaka (2009), who found a functional  
224 dissociation of VTA and SN, we also found a surprise signal in the SN but not in the VTA.

225 Given previous findings (Fiorillo et al., 2003) and theoretical considerations (as a  
226 reward predicting cue could elicit already a RPE, when the reward expectations through  
227 the whole experiment are known; see Hare, O’Doherty, Camerer, Schultz, & Rangel, 2008),  
228 one might expect to find EV signals in the SN/VTA. Since participants were explicitly  
229 instructed that the initial bet’s outcome was random, there was perhaps less focus on the  
230 action and more on the reward structure of the task (i.e., the distribution of outcome one  
231 can expect given a certain number and choice pair). Note, however, that we did find positive  
232 correlations with EV in the ventromedial prefrontal cortex and ventral striatum, in line with  
233 previous studies inspecting value signaling in the cortex (Bartra et al., 2013; Schoenbaum,  
234 Takahashi, Liu, & McDannald, 2011).

235 The presence of a full RPE signal in both the VTA and the SN confirms previous  
236 results in animal studies (Schultz, 2015), although most of them are based on signal from  
237 the lateral part of the the VTA alone (Eshel, Tian, Bukwich, & Uchida, 2016). It also  
238 clarifies previous results on the VTA/SN signals in fMRI human studies (D’Ardenne et al.,  
239 2008; Pauli et al., 2015; Zhang et al., 2017). For instance, D’Ardenne et al. (2008) only  
240 found evidence for a positive RPE in VTA and not in SN. We also found an RPE signal  
241 in ventral striatum, orbital frontal cortex, and anterior insula, confirming previous fMRI  
242 results that looked at dopamine target areas (Bartra et al., 2013).

243 Here, we showed the presence of a risk signal in both the VTA and the SN, in line  
244 with electrophysiological studies in non-human animals (Fiorillo et al., 2003). We also found  
245 a risk signal in insula and orbital frontal cortex, confirming previous fMRI studies linking  
246 these areas to the coding of risk (Brown & Braver, 2018; Preuschoff et al., 2006).

247 The presence of a surprise signal in the SN and not in the VTA fits remarkably well  
248 with results from the animal literature (Matsumoto & Hikosaka, 2009) and with the frame-  
249 work proposed by Bromberg-Martin, Matsumoto, and Hikosaka (2010). In this framework,  
250 there are two distinct functional groups of dopamine neurons, a motivational value group,  
251 that shows the standard RPE response, and a motivational salience group, that reflects how  
252 unexpected outcomes are – positive or negative alike. Cells of the first group are situated  
253 more in the ventromedial part of the SNc and throughout the VTA, while cells of the second  
254 group are situated more in the dorsolateral part of the SNc as well as in the medial VTA.  
255 While SNc cells project more to sensorimotor dorsolateral striatum, VTA cells project more  
256 to ventral striatum. Beyond our ROIs, we also found correlations between surprise and  
257 posterior (but not anterior) insula.

258 Both the SN and the VTA are relatively small subcortical structures (around 511  
259 mm<sup>3</sup> and 138 mm<sup>3</sup>, respectively, see Table 1), they are adjacent to each other as well as to  
260 other nuclei with related functions, such as the red nucleus and the subthalamic nucleus,

261 and they are susceptible to other possible sources of noise, such as the physiological noise  
262 in the cerebrospinal fluid. The small dimension of the nuclei and their spatial contiguity  
263 increase the risk of confusing the signal from different regions (de Hollander et al., 2015;  
264 Trutti et al., 2019). To be able to more reliably extract and separate the signals from the  
265 VTA and the SN, we therefore drew individual masks, based on 0.7 mm isotropic, multi-  
266 modal, anatomical images that were acquired for each participant in a separate session. By  
267 restricting the analyses to the individual space, we also prevented misalignment issues that  
268 usually occur when transforming individual images to a group or standard space. To define  
269 the final masks, we adopted a rather conservative approach, by keeping the intersection  
270 of the masks drawn by two independent and trained raters. To illustrate the importance  
271 of these precautions, we compared our masks to previously proposed VTA and SN prob-  
272 abilistic masks in the standard space. In particular, we considered the SN subdivisions  
273 proposed by Zhang et al. (2017) and the VTA and the SN subdivisions proposed by Pauli  
274 et al. (2018). We found that when transforming these masks to the individual space – as  
275 it is usually done during ROI signal extraction – the signal from the VTA and the SN is  
276 indeed partially mixed. This can have serious impact on the interpretation of the results  
277 of an fMRI study. For instance, Zhang et al. (2017) reported an RPE signal in the medial  
278 part of the SN, which – according to our analyses and results – is the part that overlaps  
279 the most with the VTA, and a surprise signal in the lateral part of the SN. To be able to  
280 draw strong conclusions on the functional specificity of – in this case – SN subdivisions, we  
281 would thus argue that it is preferable to have individually drawn masks.

282 Future studies could attempt to distinguish between the pars compacta and reticulata  
283 of the SN, as dopamine neurons are mainly situated in the pars compacta (Roeper, 2013).  
284 However, these two parts are virtually indistinguishable based on MRI contrast alone (see  
285 Figure 2). Therefore, to avoid making an arbitrary decisions on where to set a border  
286 between the two, we considered the SN as one structure. By combining different method-  
287 ologies (i.e., diffusion MRI) future studies might be able to shed light on SN functional  
288 subdivisions.

289 Another limitation of the present study relies in the nature of the BOLD signal.  
290 Since the BOLD response measured in fMRI is an indirect measure of neuronal activity  
291 and is mainly thought to measure signals input and local processing of neurons rather than  
292 their output (Logothetis & Wandell, 2004), it is important to integrate results from different  
293 methodologies and species in order to understand the complexity of the dopaminergic circuit  
294 as a whole.

295 In sum, in this study we used novel methodologies to investigate how the brain pro-  
296 cesses gains and losses and updates expectations based on experience. We were able to  
297 show a risk signal in the dopamine nuclei and provided evidence for a full RPE signal in the  
298 presence of both gains and losses, thus clarifying previous results of human fMRI studies.  
299 This study opens the way to a better understanding of the dopamine circuit in the human  
300 brain, especially regarding the functional specificity of the SN and the VTA (or of their  
301 subregions) in reward-based decision making and adaptive behavior.



302

## Materials & Methods

### 303 Participants and procedure

304 Twenty-seven participants [8 male (mean age=24.7, SD=5.0, min=19, max=35), 19  
305 female (mean age=24.4, SD=4.7, min=19, max=35)] took part in the experiment. The  
306 study was approved by the ethics committee of the University of Amsterdam. All par-  
307 ticipants completed two separate sessions, one to obtain multimodal, 0.7 mm isotropic  
308 structural data, and one to obtain 1.5 mm isotropic functional data while participants en-  
309 gaged in a number-guessing task. All participants were recruited from the University of  
310 Amsterdam subject pool, via flyers and posters at the Spinoza center for Neuroimaging and  
311 at the Academic Medical Center in Amsterdam, and via advertisements in the magazine  
312 of the Dutch Parkinson Society. All participants were required to be MRI compatible, be-  
313 tween 18 and 40 years old, right-handed, without previous history of psychiatric conditions  
314 or neurological diseases, and to have normal or corrected-to-normal vision. Before taking  
315 part in the sessions they gave written consent, and, before the second session, they received  
316 written instructions for the behavioral task. Before going in the MRI scanner, they all  
317 completed a training session in which they could try the experiment on a computer, and  
318 were given a written questionnaire to test their comprehension of the probability of winning  
319 and losing in each scenario of the behavioral task. All participants were given 20 euros as  
320 compensation for the second session. In the second session they could win or lose up to 7  
321 euros based on their performance in the task, which were either added or subtracted from  
322 an additional endowment of 10 euro.

### 323 Data acquisition

324 All images were acquired on a Philips Achieva 7T MRI scanner, situated at the  
325 Spinoza Centre for Neuroimaging in Amsterdam (Netherlands), using a Nova Medical 32-  
326 channel head array coil. During the first session, participants could choose whether to watch  
327 a movie or not. During the second session, the number-guessing task was presented using  
328 PsychoPy (Peirce, 2007).

329 *Structural MRI.*  $T_1$ -weighted,  $T_2^*$ -weighted, and Quantitative Susceptibility Mapping  
330 (QSM, Langkammer et al., 2012) images were simultaneously obtained using a multi-echo  
331 magnetization-prepared rapid gradient echo (ME-MP2RAGE) sequence (Caan et al., 2018;  
332 Metere, Kober, Möller, & Schäfer, 2017). The sequence parameters were:  $T_{I,1} = 670$  ms,  
333  $T_{I,2} = 3675.4$  ms,  $T_{R,1} = 6.2$  ms,  $T_{R,2} = 31$  ms,  $T_{E,1} = 3$  ms,  $T_{E,2} = [3, 11.5, 19,$   
334  $28.5$  ms],  $T_{R,MP2RAGE} = 6778$  ms, flip angle<sub>1</sub>: 4°, flip angle<sub>2</sub>: 4°, bandwidth: 404.9 MHz,  
335 acceleration factor SENSE: 2, FOV = 205 x 205 x 164 mm<sup>3</sup>, acquired voxel size: .7 x .7 x  
336 .7 mm<sup>3</sup>, acquisition matrix: 292 x 290, reconstructed voxel size: .64 x .64 x .70 mm<sup>3</sup>, turbo  
337 factor: 150 (resulting in 176 shots). The total acquisition time was 19.53 min.

338 *Functional MRI.* The functional MRI protocol was an adaptation of Protocol 3 as  
339 reported by (de Hollander et al., 2017), originally designed for a 7T Siemens scanner lo-  
340 cated at the Max Planck Institute for Human Cognitive and Behavioral Sciences in Leipzig,  
341 Germany. This protocol was used to optimize the tSNR in iron-rich nuclei in the human  
342 midbrain. The present protocol consisted of 2 runs of 719 volumes with 30 slices. The  
343 acquisition time was 23.97 min per run. Other parameters were  $T_R = 2,000$  ms,  $T_E =$   
344 17 ms, flip angle: 60°, bandwidth: 2226.2 Hz, voxel size: 1.5 x 1.5 x 1.5 mm<sup>3</sup>, FOV =

345 192 x 192 x 49 mm<sup>3</sup>, SENSE acceleration factor, P-reduction (AP): 3, matrix size: 128 x  
346 128. To acquire images with such TE, TR, and voxel-size, the protocol did not employ Fat  
347 suppression, and, to increase SNR, the protocol did not employ Partial Fourier. After the  
348 first run, an EPI image with opposite phase coding direction as compared to the functional  
349 scan was acquired to help correcting for geometric distortions due to inhomogeneities in the  
350 B0 field using the TOPUP technique during preprocessing (see below).

### 351 **Number-guessing task**

352 The number-guessing task used in the present study is an adaptation of the task  
353 by Preuschoff et al. (2006). In each trial (Figure 1A), two numbers were sampled one  
354 after the other from the set 1, 2, 3, 4, 5 without replacement. At the beginning of each trial,  
355 before seeing both numbers, participants were asked to bet which of the two numbers will be  
356 higher: They could win 5 euro if their bet (i.e., their prediction) was correct, and lose 5 euro  
357 otherwise. Participants were also instructed that the sampling was (pseudo-) random and  
358 that their choice could not influence sampling. The texts "*Second number is HIGHER.*" and  
359 "*Second number is LOWER.*" appeared on the left and right side of the screen, respectively  
360 (the position was counterbalanced across participants), and participants had to press either  
361 a left or a right button to place their bet. They could do so within 1 second, otherwise  
362 a bet would be placed for them at random. The choice (either the participant's or the  
363 random one) was then indicated by presenting a black frame around the corresponding text  
364 for another second.

365 The first number was subsequently shown for 2 seconds. Based on this first number,  
366 participants can update the probability to win or lose (both 50% at the beginning of the  
367 trial). For example, if a bet is placed on the second number being higher than the first  
368 number, and the first number is revealed to be 2, then three out of the four remaining  
369 numbers (i.e., 3, 4, and 5) lead to winning ( $p_{winning} = 75\%$ ), while only one number (i.e.,  
370 1) leads to losing ( $p_{losing} = 25\%$ ). The expected value (EV) of the gamble is calculated as:

$$EV = p_{winning} \cdot 5 - p_{losing} \cdot 5 \quad (1)$$

371 and in this case is thus  $5 \cdot 0.75 - 5 \cdot 0.25 = 2.5$  euros. The risk, often defined as the variance  
372 of the possible outcomes (Markowitz, 1952), is thus 4.3. Note that, when the first number  
373 is 3, the probability to win remains 50%, the EV remains 0, and the risk is highest, equal  
374 to 5. On the contrary, when the first number is either 1 or 5, participants already know  
375 whether they will lose or win (depending on what the bet was), therefore the EV is either  
376  $-5$  or 5 euros and the risk is always 0. Since we were interested in neural correlates of  
377 both EV and risk, it is a crucial aspect of this design that EV and risk are not correlated  
378 (Figure 1B).

379 At last, the second number is shown for 2 seconds, together with the corresponding  
380 gain or loss. At this point, the reward prediction error (RPE) is calculated:

$$RPE = outcome - EV. \quad (2)$$

381 In the example above (i.e., bet on 2nd number being higher; first number is 2), if the second  
382 number is 3, the reward is 5 euros and the reward prediction error is  $5 - 2.5 = 2.5$  euros.  
383 The surprise, defined as the absolute value of the reward prediction error (i.e., the reward

384 expectation after the first number) as in Schultz (2015) and in Hayden et al. (2011), is  
385 thus  $|5 - 2.5| = 2.5$ . Since we were also interested in neural correlates of both RPE and  
386 surprise, it was also crucial that they were uncorrelated. This was the case, since RPE  
387 ranged between -7.5 and 7.5 and its distribution over trials was symmetrically centered  
388 around 0, and surprise was simply its absolute value.

389 The experiment consisted of 120 trials, divided in two blocks. In each block, 5 test tri-  
390 als were included to encourage participants to remain attentive throughout the experiment.  
391 In these trials, instead of showing the reward, we asked participants to indicate whether  
392 they won or lost. To correctly respond to this question, they needed to remember both  
393 their bet and the first number. At the end of the experiment, we randomly selected one  
394 of the 110 regular trials, and participants received the corresponding reward (i.e., 5 or -5  
395 euros), plus 2 additional euros if they responded correctly to at least 8 of the 10 test trials,  
396 otherwise we subtracted 2 euros to the final reward. Between each event in each trial, and  
397 at the beginning of each trial, a fixation cross was presented for a period of time between  
398 4 and 10 seconds, drawn from a truncated exponential distribution. The long inter-stimuli  
399 intervals were crucial to allow separating the BOLD signals associated with the first and  
400 the second numbers (i.e., signals related to either expectations or feedback processing).

#### 401 Behavioral analysis

402 Because choices are not influencing the chance of winning or losing in this task, be-  
403 havioral analyses had the purpose to check the quality of the data for the fMRI analyses.  
404 The most important indicator of data quality was the accuracy in the test trials: Blocks in  
405 which participants made more than two out of five mistakes were discarded, where misses  
406 also counted as mistakes. Another important indicator was the number of missed bets:  
407 Blocks in which participants missed more than ten out of 60 bets were discarded. Finally,  
408 we checked the percentage of right vs. left responses. Because the position of the texts  
409 corresponding to the specific bets was counterbalanced across – but fixed within – partici-  
410 pants, a similar number of right and left responses needed to be made for a balanced design.  
411 Blocks in which participants made less than ten right or more than fifty right (out of 60)  
412 choices were discarded.

#### 413 Structural and functional MRI data preprocessing

414 Registration and preprocessing were performed using FMRIprep version 1.0.6 (Es-  
415 teban et al., 2018), a Nipype (Gorgolewski et al., 2011) based tool. Registration across  
416 session was done by registering the functional images (from the second session) to the T<sub>1</sub>-  
417 weighted structural image multiplied by the first echo of the T<sub>2</sub>\*-weighted structural images  
418 (from the first session). Because the T<sub>1</sub>-weighted, T<sub>2</sub>\*-weighted, and QSM structural images  
419 were acquired simultaneously during the same scan in the first session, there was no need  
420 to co-register them first.

421 Structural images were corrected for intensity non-uniformity using N4 Bias Field  
422 Correction (Tustison et al., 2010) and skull-stripped using `antsBrainExtraction.sh`. Spatial  
423 normalization to the ICBM 152 Nonlinear Asymmetrical template (Fonov, Evans, McK-  
424 instry, Almlí, & Collins, 2009) was performed through nonlinear registration with the  
425 `antsRegistration` tool of ANTs v2.1.0 (Avants, Epstein, Grossman, & Gee, 2008), using

426 brain-extracted versions of both  $T_1$ -weighted volume and template. Brain tissue segmenta-  
427 tion of cerebrospinal fluid (CSF), white-matter (WM) and gray-matter (GM) was performed  
428 on the brain-extracted  $T_1$ -weighted image using *fast* (FSL v5.0.9) (Zhang, Larcher, Masic, &  
429 Dagher, 2001). Functional data was motion corrected using *mcfliirt* (FSL v5.0.9, Jenkinson,  
430 Bannister, Brady, & Smith, 2002). Distortion correction was performed using an imple-  
431 mentation of the TOPUP technique (Andersson, Skare, & Ashburner, 2003) using *3dQwarp*  
432 (AFNI v16.2.07, Cox, 1996). This was followed by co-registration to the corresponding  $T_1$ -  
433 weighted image using boundary-based registration Greve and Fischl (2009) with 9 degrees  
434 of freedom, using *flirt* (FSL). Motion correcting transformations, field distortion correct-  
435 ing warp, BOLD-to- $T_1$ -weighted transformation and  $T_1$ -weighted-to-template (MNI) warp  
436 were concatenated and applied in a single step using *antsApplyTransforms* (ANTs v2.1.0)  
437 using Lanczos interpolation.

438 Physiological noise regressors were extracted applying *CompCor* (Behzadi, Restom,  
439 Liau, & T.Liu, 2007). Principal components were estimated for the anatomical *CompCor*  
440 (*aCompCor*). A mask to exclude signal with cortical origin was obtained by eroding the  
441 brain mask, ensuring it only contained subcortical structures. Six *tCompCor* components  
442 were then calculated including only the top 5% variable voxels within that subcortical mask.  
443 For *aCompCor*, six components were calculated within the intersection of the subcortical  
444 mask and the union of CSF and WM masks calculated in  $T_1$ -weighted space, after their  
445 projection to the native space of each functional run. FD was calculated for each functional  
446 run using the implementation of *Nipype*.

447 The preprocessing and registration output was visually inspected for each subject  
448 using the *html* output files of *FMRIprep*. Functional data quality was assessed using  
449 *MRIQC* (Esteban et al., 2017) prior preprocessing, to check for visual artifacts and excessive  
450 head movements. Finally, after preprocessing and registration, *tSNR* maps were computed  
451 using *Nipype* to assess the *tSNR* across the ROIs.

## 452 **Anatomical segmentation**

453 One main aim of the present study was to obtain anatomically precise masks in the  
454 individual space for the two ROIs: the ventral tegmental area (VTA) and the substantia  
455 nigra (SN). Because of its relatively high iron concentration, the SN is most discernible in  
456 QSM images (Keuken et al., 2014), as shown in the first row of Figure 2. Unlike the SN, the  
457 VTA lacks clear anatomical borders (Trutti et al., 2019). Segmentation can be performed,  
458 however, by exclusion from the neighboring iron-rich nuclei (i.e., the SN and the red nucleus,  
459 RN) and the CSF, so both should be clearly visible. The CSF is not visible in the QSM  
460 image. It is, however, clearly visible in the  $T_1$ -weighted image (see Figure 2, third row).  
461 To ease and improve the segmentation process, we therefore combined the  $T_2^*$ -weighted and  
462  $T_1$ -weighted images, by first normalizing them within the midbrain area (i.e., a pre-selected  
463 area of  $1.6 \times 1.6 \times 3.08 \text{ cm}^3$ ) and finally summing them up. The result can be seen in  
464 the bottom row of Figure 2: The QSM images in the first row show a high contrast for  
465 iron rich areas, such as the SN, the red nucleus (situated above and posterior to the SN),  
466 and the subthalamic nucleus (situated above and anterior to the SN); the  $T_2^*$ -weighted and  
467  $T_1$ -weighted images (second and third row) highlight, respectively, iron rich areas and the  
468 CSF; their sum (fourth row) thus allows to segment the VTA, as it is mainly defined by the  
469 border it shares with these regions (which are hard to visualize within the same contrast).

470 Manual segmentation was performed using FSLView version 3.0.2, by two independent  
471 and trained researchers (one of which is the first author of this study). Only the voxels that  
472 were marked by both researchers were kept in the final masks, that is, the conjunction  
473 masks. To assess inter-rater reliability (i.e., the agreement between the two researcher),  
474 we computed the Dice score (Dice, 1945) separately for each participant, hemisphere, and  
475 structure. The Dice score is computed as the ratio between the union of the two areas and  
476 the conjunction of the two areas. It therefore depends on the average dimension of the  
477 structure (with smaller structures usually having lower scores) and has to be interpreted  
478 accordingly. Scores approaching 1 indicate perfect agreement between raters, while scores  
479 close to 0 indicate no agreement between raters.

480 Drawing individual masks for each subject and area is a time- and resource-consuming  
481 process: High resolution structural images need to be acquired first, and then two trained  
482 researchers need to complete a lengthy segmentation process. To forgo this costly approach,  
483 SN (Keuken et al., 2014) and VTA (Pauli et al., 2018) MRI atlases have been published in  
484 recent years. These atlases consists of probabilistic maps of different ROIs in MNI space, and  
485 can be thus transformed in the individual space to extract the signal from these regions.  
486 The disadvantage of this less resource-intensive approach, however, is a potential loss of  
487 sensitivity and specificity due to misalignment between the individual and the standard  
488 spaces, as well as individual differences. To quantify the loss of information in this process,  
489 we transformed the three SN subregions proposed by Zhang et al. (2017), based on the  
490 33% thresholded probabilistic masks proposed by Keuken et al. (2014), to the individual  
491 space and measured the overlap with our individual VTA masks as the number of voxels in  
492 common, divided by the overall area. A similar procedure was done with the proposed VTA  
493 and SN subdivisions of Pauli et al. (2018), using their deterministic atlas (50% thresholded).

#### 494 **fMRI data analysis**

495 We extracted the fMRI signal for each time point within the ROIs (i.e., left and  
496 right SN and VTA) for each subject and computed its average time course for each ROI  
497 separately. We then fitted a GLM to the resulting time series for every region, participant,  
498 and block using statsmodels (Seabold & Perktold, 2010). Specifically, we used the GLSAR  
499 AR(1) model, to account for autocorrelation. The design matrices were constructed using  
500 Nistats (<https://nistats.github.io/index.html>). In the design matrices, the following  
501 events were convolved with the canonical, double-gamma hemodynamic response function  
502 (HRF): the bet at the beginning of the trial, the appearance of the first number, the  
503 appearance of the second number in regular trials, and the appearance of the second number  
504 in test trials. On top of these, we added four parametric regressors: EV and risk (with  
505 onsets at the appearance of the first number and as amplitude the normalized EV and  
506 risk of each trial), and RPE and surprise (with onsets at the appearance of the second  
507 number and as amplitude the normalized RPE and surprise of each trial). The duration  
508 of the parametric regressors, together with their intercepts (i.e., the appearance of the first  
509 and second number), was set to 2 seconds, as this was the time of presentation of the  
510 numbers on the screen. Additional nuisance parameters were the six aCompCor, FD, six  
511 head movement variables provided by *fmripiprep*, and cosine regressors for high-pass temporal  
512 filtering. No spatial smoothing was used. After averaging across blocks, we performed  
513 independent two-sided t-tests, separately by ROIs and hemisphere (i.e., left vs. right) for

514 the mean of the parameters corresponding to EV, risk, RPE, and surprise being equal to  
515 zero. We also estimated the equivalent Bayesian t-tests, as implemented in the BayesFactor  
516 R library (<https://cran.r-project.org/web/packages/BayesFactor/index.html>), as  
517 it allows quantifying evidence in favor of the null hypothesis and therefore complements the  
518 frequentist analyses.

519 For the exploratory and control analyses, we estimated the same GLMs  
520 as on the ROIs, using a mass-univariate, voxel-wise approach with Nistats  
521 (<https://nistats.github.io/index.html>). At the level of individual runs, we used a  
522 smoothing Gaussian kernel with a FWHM of 3.0 mm. At the participant level, we esti-  
523 mated the size of the baseline contrasts of the parameter estimates of EV, risk, RPE, and  
524 surprise. These participant-wise contrasts of parameter estimates (COPE) were then trans-  
525 formed to the MNI space and used in the third and final group-level analysis. Finally, we  
526 performed a Gaussian Random Field cluster analysis on the resulting four z-maps (EV, risk,  
527 RPE, and surprise), using FSL *cluster tool*. For these analyses, we set an input threshold  
528 of 2.3 and a cluster-wise threshold of  $p < .05$ .

### Acknowledgements

We would like to thank Josephine Groot and Martijn Mulder for helping with collecting the data and recruiting participants, Wietske van der Zwaag for helping setting up the fMRI protocol, and Gilles de Hollander for consultation concerning fMRI in the mid-brain. Further thanks go to Anne Trutti, for sharing her knowledge of the VTA anatomy and for helping with VTA segmentation, and to Anneke Alkemade, for helping with the SN segmentation.

References

- Andersson, J. L. R., Skare, S., & Ashburner, J. (2003). Symmetric diffeomorphic image registration with cross-correlation: Evaluating automated labeling of elderly and neurodegenerative brain. *NeuroImage*, *20*(2), 870–888. doi: 10.1016/S1053-8119(03)00336-7
- Arias-Carrión, O., Stamelou, M., Murillo-Rodríguez, E., Menéndez-González, M., & Pöppel, E. (2010). Dopaminergic reward system: A short integrative review. *International Archives of Medicine*, *3*(24), 1–6. doi: 10.1186/1755-7682-3-24
- Avants, B. B., Epstein, C. L., Grossman, M., & Gee, J. C. (2008). Symmetric diffeomorphic image registration with cross-correlation: Evaluating automated labeling of elderly and neurodegenerative brain. *Medical Image Analysis*, *12*(1), 26–41. doi: 10.1016/j.media.2007.06.004
- Bartra, O., McGuire, J. T., & Kable, J. W. (2013). The valuation system: A coordinate-based meta-analysis of bold fmri experiments examining neural correlates of subjective value. *NeuroImage*, *76*, 412–427. doi: 10.1016/j.neuroimage.2013.02.063
- Bayer, H. M., & Glimcher, P. W. (2005). Midbrain dopamine neurons encode a quantitative reward prediction error signal. *Neuron*, *47*(1), 129–141.
- Behzadi, Y., Restom, K., Liao, J., & T.Liu, T. (2007). A component based noise correction method (CompCor) for BOLD and perfusion based fMRI. *NeuroImage*, *37*(1), 90–101. doi: 10.1016/j.neuroimage.2007.04.042
- Bergh, C., Eklund, T., Södersten, P., & Nordin, C. (1997). Altered dopamine function in pathological gambling. *Psychological Medicine*, *27*(2), 473–475. doi: 10.1017/S0033291796003789
- Bromberg-Martin, E. S., Matsumoto, M., & Hikosaka, O. (2010). Dopamine in motivational control: Rewarding, aversive, and alerting. *Neuron*, *68*(5), 815–834. doi: 10.1016/j.neuron.2010.11.022
- Brown, J., & Braver, T. (2018). Risk prediction and aversion by anterior cingulate cortex. *Cognitive, Affective, & Behavioral Neuroscience*, *7*(4), 266–277. doi: 10.3758/CABN.7.4.266
- Caan, M., Bazin, P.-L., Fracasso, A., Marques, J., Dumoulin, S., & van der Zwaag, W. (2018). *MP2RAGEME: T<sub>1</sub>, T<sub>2</sub><sup>\*</sup> and QSM mapping in one sequence at 7 Tesla*. (Poster presented at the Joint Annual Meeting ISMRM-ESMRMB, Paris, France)
- Clithero, J. A., & Rangel, A. (2014). Informatic parcellation of the network involved in the computation of subjective value. *Social Cognitive and Affective Neuroscience*, *9*(9), 1289–1302. doi: 10.1093/scan/nst106
- Cox, R. W. (1996). AFNI: Software for analysis and visualization of functional magnetic resonance neuroimages. *Computers and Biomedical Research*, *29*(3), 162–173. doi: 10.1006/cbmr.1996.0014
- D’Ardenne, K., McClure, S. M., Nystrom, L. E., & Cohen, J. D. (2008). BOLD responses reflecting dopaminergic signals in the human ventral tegmental area. *Science*, *319*(5867), 1264–1267. doi: 10.1126/science.1150605
- de Hollander, G., Keuken, M. C., & Forstmann, B. U. (2015). The subcortical cocktail problem; mixed signals from the subthalamic nucleus and substantia nigra. *PloS One*, *10*(2), 1–18. doi: 10.1371/journal.pone.0120572
- de Hollander, G., Keuken, M. C., van der Zwaag, W., Forstmann, B. U., & Trampel, R. (2017). Comparing functional MRI protocols for small, iron-rich basal ganglia nuclei such as the subthalamic nucleus at 7T and 3T. *Human Brain Mapping*, *38*(6), 3226–3248. doi: 10.1002/hbm.23586
- Dice, L. R. (1945). Measures of the amount of ecologic association between species. *Ecology*, *26*(3), 297–302. doi: 10.2307/1932409
- Drayer, B., Burger, P., Darwin, R., Riederer, S., Herfkens, R., & Johnson, G. (1986). Mri of brain iron. *American Journal of Roentgenology*, *147*(1), 103–110.
- Eapen, M., Zald, D. H., Gatenby, J. C., Ding, Z., & Gore, J. C. (2011). Using high-resolution MR imaging at 7T to evaluate the anatomy of the midbrain dopaminergic system. *American*

- Journal of Neuroradiology*, 32(4), 688–694. doi: 10.3174/ajnr.A2355
- Eshel, N., Tian, J., Bukwich, M., & Uchida, N. (2016). Dopamine neurons share common response function for reward prediction error. *Nature Neuroscience*, 19, 479–486. doi: 10.3174/ajnr.A2355
- Esteban, O., Birman, D., Schaer, M., Koyejo, O. O., Poldrack, R. A., & Gorgolewski, K. J. (2017). MRIQC: Advancing the automatic prediction of image quality in MRI from unseen sites. *PLoS One*, 12(9), 1–21. doi: 10.1371/journal.pone.0184661
- Esteban, O., Markiewicz, C., Blair, R. W., Moodie, C., Isik, A. I., Aliaga, A. E., ... Gorgolewski, K. J. (2018). *FMRIPrep: a robust preprocessing pipeline for functional MRI*. doi: 10.1101/306951
- Everitt, B. J., & Robbins, T. W. (2005). Neural systems of reinforcement for drug addiction: From actions to habits to compulsion. *Nature Neuroscience*, 8(11), 1481–1489. doi: 10.1038/nm1579
- Fearnley, J. M., & Lees, A. J. (1991). Ageing and Parkinson's disease: Substantia nigra regional selectivity. *Brain*, 114(5), 2283–2301. doi: 10.1093/brain/114.5.2283
- Fiorillo, C. D., Tobler, P. N., & Schultz, W. (2003). Discrete coding of reward probability and uncertainty by dopamine neurons. *Science*, 299(5614), 1898–1902. doi: 10.1126/science.1077349
- Fonov, V. S., Evans, A. C., McKinstry, R. C., Almlí, C. R., & Collins, D. L. (2009). Unbiased nonlinear average age-appropriate brain templates from birth to adulthood. *NeuroImage*, 4(Supplement 1), 39–41. doi: 10.1016/S1053-8119(09)70884-5
- Forstmann, B. U., de Hollander, G., van Maanen, L., Alkemade, A., & Keuken, M. C. (2017). Towards a mechanistic understanding of the human subcortex. *Nature Reviews Neuroscience*, 18(1), 57–65.
- Fouragnan, E., Retzler, C., & Philiastides, M. G. (2018). Separate neural representations of prediction error valence and surprise: Evidence from an fMRI meta-analysis. *Human Brain Mapping*, 39, 2887–2906. doi: 10.1002/hbm.24047
- Frank, M. J. (2006a). Dynamic dopamine modulation in the basal ganglia: A neurocomputational account of cognitive deficits in medicated and nonmedicated Parkinsonism. *Journal of Cognitive Neuroscience*, 17(1), 17–52. doi: 10.1162/0898929052880093
- Frank, M. J. (2006b). Hold your horses: a dynamic computational role for the subthalamic nucleus in decision making. *Neural Networks*, 19(8), 1120–1136.
- Gorgolewski, K., Burns, C. D., Madison, C., Clark, D., Halchenko, Y. O., Waskom, M. L., & Ghosh, S. S. (2011). Nipype: A flexible, lightweight and extensible neuroimaging data processing framework in Python. *Frontiers in Neuroinformatics*, 5(13), 1–15. doi: 10.3389/fninf.2011.00013
- Greve, D. N., & Fischl, B. (2009). Accurate and robust brain image alignment using boundary-based registration. *NeuroImage*, 48(1), 63–72. doi: 10.1016/j.neuroimage.2009.06.060
- Haber, S. N., & Knutson, B. (2010). The reward circuit: Linking primate anatomy and human imaging. *Neuropsychopharmacology*, 35(1), 4–26. doi: 10.1038/npp.2009.129
- Hare, T. A., O'Doherty, J., Camerer, C. F., Schultz, W., & Rangel, A. (2008). Dissociating the role of the orbitofrontal cortex and the striatum in the computation of goal values and prediction errors. *The Journal of Neuroscience*, 28(22), 5623–5630. doi: 10.1523/JNEUROSCI.1309-08.2008
- Hayden, B. Y., Heilbronner, S. R., Pearson, J. M., & Platt, M. L. (2011). Surprise signals in anterior cingulate cortex: Neuronal encoding of unsigned reward prediction errors driving adjustment in behavior. *Journal of Neuroscience*, 31(11), 4178–4187. doi: 10.1523/JNEUROSCI.4652-10.2011
- Jeffreys, H. (1961). *Theory of probability (3rd ed.)*. Oxford, UK: Oxford University Press.
- Jenkinson, M., Bannister, P., Brady, M., & Smith, S. (2002). Improved optimization for the robust and accurate linear registration and motion correction of brain images. *NeuroImage*, 17(2), 825–841. doi: 10.1006/ning.2002.1132
- Keuken, M. C., Bazin, P.-L., Crown, L., Hootsmans, J., Laufer, A., Müller-Axt, C., ... Forstmann,



- B. U. (2014). Quantifying inter-individual anatomical variability in the subcortex using 7 T structural MRI. *NeuroImage*, *94*(1), 40–46. doi: 10.1016/j.neuroimage.2014.03.032
- Langkammer, C., Schweser, F., Krebs, N., Deistung, A., Goessler, W., Scheurer, E., ... Reichenbach, J. R. (2012). Quantitative susceptibility mapping (QSM) as a means to measure brain iron? A post mortem validation study. *NeuroImage*, *62*(3), 1593–1599. doi: 10.1016/j.neuroimage.2012.05.049
- Logothetis, N. K., & Wandell, B. A. (2004). Interpreting the BOLD signal. *Annual Review of Physiology*, *66*, 735–69. doi: 10.1146/annurev.physiol.66.082602.092845
- Markowitz, H. (1952). Portfolio selection. *The Journal of Finance*, *7*(1), 77–91. doi: 10.1111/j.1540-6261.1952.tb01525.x
- Matsumoto, M., & Hikosaka, O. (2009). Two types of dopamine neuron distinctly convey positive and negative motivational signals. *Nature*, *459*(7248), 837–841. doi: 10.1038/nature08028
- Metere, R., Kober, T., Möller, H. E., & Schäfer, A. (2017). Simultaneous quantitative MRI mapping of T<sub>1</sub>, T<sub>2</sub>\* and magnetic susceptibility with multi-echo MP2RAGE. *PLoS One*, *12*(1), 1–28. doi: 10.1371/journal.pone.0169265
- O’Doherty, J. P., & Bossaerts, P. (2008). Toward a mechanistic understanding of human decision making: Contributions of functional neuroimaging. *Current Directions in Psychological Science*, *17*(2), 119–123. doi: 10.1111/j.1467-8721.2008.00560.x
- Pauli, W. M., Larsen, T., Collette, S., Tyszka, J. M., Seymour, B., & O’Doherty, J. P. (2015). Distinct contributions of ventromedial and dorsolateral subregions of the human substantia nigra to appetitive and aversive learning. *The Journal of Neuroscience*, *13*(42), 14220–14233. doi: 10.1523/JNEUROSCI.2277-15.2015
- Pauli, W. M., Nili, A. N., & Tyszka, J. M. (2018). A high-resolution probabilistic in vivo atlas of human subcortical brain nuclei. *Scientific Data*, *5*(180063), 1–13. doi: 10.1038/sdata.2018.63
- Peirce, J. W. (2007). PsychoPy—psychophysics software in Python. *Journal of Neuroscience Methods*, *162*(1-2), 8–13. doi: 10.1016/j.jneumeth.2006.11.017
- Power, J. D., Mitra, A., Laumann, T. O., Snyder, A., Schlaggar, B., & Petersen, S. (2014). Methods to detect, characterize, and remove motion artifact in resting state fMRI. *NeuroImage*, *84*(1), 320–341. doi: 10.1016/j.neuroimage.2013.08.048
- Preusschoff, K., Bossaerts, P., & Quartz, S. R. (2006). Neural differentiation of expected reward and risk in human subcortical structures. *Neuron*, *51*, 381–390. doi: 10.1016/j.neuron.2006.06.024
- Roeper, J. (2013). Dissecting the diversity of midbrain dopamine neurons. *Trends in neurosciences*, *36*(6), 336–342.
- Schoenbaum, G., Takahashi, Y., Liu, T.-L., & McDannald, M. A. (2011). Does the orbitofrontal cortex signal value? *Annals of the New York Academy of Sciences*, *1239*, 87–99. doi: 10.1111/j.1749-6632.2011.06210.x
- Schultz, W. (1998). Predictive reward signal of dopamine neurons. *Journal of neurophysiology*, *80*(1), 1–27. doi: 10.1152/jn.1998.80.1.1
- Schultz, W. (2015). Neuronal reward and decision signals: From theories to data. *Physiological Reviews*, *95*, 853–951. doi: 10.1152/physrev.00023.2014
- Seabold, S., & Perktold, J. (2010). Statsmodels: Econometric and statistical modeling with Python. In *Proceedings of the 9th Python in science conference* (pp. 57–61).
- Singer, T., Critchley, H. D., & Preusschoff, K. (2009). A common role of insula in feelings, empathy and uncertainty. *Trends in Cognitive Sciences*, *13*(8), 334–340. doi: 10.1016/j.tics.2009.05.001
- Sutton, R. S., & Barto, A. G. (1998). *Reinforcement learning: An introduction*. Cambridge: MIT press.
- Trutti, A. C., Mulder, M. J., Hommel, B., & Forstmann, B. U. (2019). Functional neuroanatomical review of the ventral tegmental area. *NeuroImage*.
- Tustison, N. J., Avants, B. B., Cook, P. A., Zheng, Y., Egan, A., Yushkevich, P. A., & Gee, J. C. (2010). N4ITK: improved N3 bias correction. *IEEE Transactions on Medical Imaging*, *29*(6),

- 1310–1320. doi: 10.1109/TMI.2010.2046908
- van der Zwaag, W., Schäfer, A., Marques, J. P., Turner, R., & Trampel, R. (2015). Recent applications of UHF-MRI in the study of human brain function and structure: A review. *NMR in Biomedicine*, 29(9), 1274–1288. doi: 10.1002/nbm.3275
- Watabe-Uchida, M., Eshel, N., & Uchida, N. (2017). Neural circuitry of reward prediction error. *Annual Review of Neuroscience*, 40, 373–394. doi: 10.1146/annurev-neuro-072116-031109
- Zaghloul, K. A., Blanco, J. A., Weidemann, C. T., McGill, K., Jaggi, J. L., Baltuch, G. H., & Kahana, M. J. (2009). Human substantia nigra neurons encode unexpected financial rewards. *Science*, 323(5920), 1496–1499. doi: 10.1126/science.1167342
- Zhang, Y., Larcher, K., Masic, B., & Dagher, A. (2001). Segmentation of brain MR images through a hidden Markov random field model and the expectation-maximization algorithm. *IEEE Transactions on Medical Imaging*, 20(1), 45–57. doi: 10.1109/42.906424
- Zhang, Y., Larcher, K., Masic, B., & Dagher, A. (2017). Anatomical and functional organization of the human substantia nigra and its connections. *eLife*, 6(e26653), 1–23. doi: 10.7554/eLife.26653

## REWARDS AND PUNISHMENTS IN THE MIDBRAIN

19

Table 1

*Anatomical segmentation results.*

|     |       |                         | Mean   | SD    | Min    | Max    |
|-----|-------|-------------------------|--------|-------|--------|--------|
| SN  | Right | Dice score              | 0.85   | 0.04  | 0.73   | 0.91   |
|     |       | Size (mm <sup>3</sup> ) | 520.77 | 76.75 | 311.49 | 637.65 |
|     | Left  | Dice score              | 0.84   | 0.04  | 0.74   | 0.90   |
|     |       | Size (mm <sup>3</sup> ) | 501.67 | 60.86 | 384.26 | 621.25 |
| VTA | Right | Dice score              | 0.56   | 0.07  | 0.43   | 0.68   |
|     |       | Size (mm <sup>3</sup> ) | 138.91 | 39.37 | 76.51  | 233.26 |
|     | Left  | Dice score              | 0.56   | 0.06  | 0.38   | 0.68   |
|     |       | Size (mm <sup>3</sup> ) | 137.46 | 38.30 | 80.82  | 224.34 |

*Note.* Dice scores and size of the individual conjunction masks of the regions of interest (ROI): left and right substantia nigra (SN) and left and right ventral tegmental area (VTA). Conjunction masks are the intersection of the two independent raters' masks. Dice scores closer to 1 indicate higher agreement between the two raters, while dice scores close to 0 indicate lower agreement between the two raters.

REWARDS AND PUNISHMENTS IN THE MIDBRAIN

Table 2  
*ROI-wise GLM results.*

| ROI       | EV                                              | risk                                              | RPE                                               | surprise                                         |
|-----------|-------------------------------------------------|---------------------------------------------------|---------------------------------------------------|--------------------------------------------------|
| SN-left   | $t(26)=-0.31, p=0.76$<br>BF <sub>10</sub> =0.21 | $t(26)=-2.44, p=0.02^*$<br>BF <sub>10</sub> =2.44 | $t(26)=1.36, p=0.187$<br>BF <sub>10</sub> =0.46   | $t(26)=0.33, p=0.74$<br>BF <sub>10</sub> =0.21   |
| SN-right  | $t(26)=-1.17, p=0.25$<br>BF <sub>10</sub> =0.38 | $t(26)=-0.42, p=0.68$<br>BF <sub>10</sub> =0.22   | $t(26)=2.54, p=0.018^*$<br>BF <sub>10</sub> =2.91 | $t(26)=2.32, p=0.03^*$<br>BF <sub>10</sub> =1.96 |
| VTA-left  | $t(26)=-1.41, p=0.17$<br>BF <sub>10</sub> =0.50 | $t(26)=-2.34, p=0.03^*$<br>BF <sub>10</sub> =2.03 | $t(26)=3.12, p=0.004^*$<br>BF <sub>10</sub> =9.42 | $t(26)=0.21, p=0.83$<br>BF <sub>10</sub> =0.21   |
| VTA-right | $t(26)=-0.28, p=0.78$<br>BF <sub>10</sub> =0.21 | $t(26)=-0.26, p=0.79$<br>BF <sub>10</sub> =0.21   | $t(26)=2.76, p=0.011^*$<br>BF <sub>10</sub> =4.46 | $t(26)=1.23, p=0.23$<br>BF <sub>10</sub> =0.40   |

*Note.* Results of the independent two-sided t-tests for the mean of the predictors of main interest of the GLM being equal to zero: expected value (EV) and expected risk (estimated when the trials' first number is presented), and reward prediction error (RPE) and surprise (estimated when the trial's reward or punishment are presented). These tests were run separately by regions of interest: left and right substantia nigra (SN), and left and right ventral tegmental area (VTA). Bayes factors (BF) higher than 1 provide evidence for an effect, while BF lower than 1 provide evidence for the absence of an effect.

REWARDS AND PUNISHMENTS IN THE MIDBRAIN

Table 3

*Results of the voxel-wise GLM after cluster-wise thresholding.*

| Predictor           | Cluster Index | Voxels | p      | -log10(p) | Max/Min | Max/Min x (vox) | Max/Min y (vox) | Max/Min z (vox) |
|---------------------|---------------|--------|--------|-----------|---------|-----------------|-----------------|-----------------|
| EV (positive)       | 5             | 871    | <0.001 | 8.57      | 3.56    | 12.0            | -55.5           | 25.5            |
| EV (positive)       | 4             | 868    | <0.001 | 8.54      | 3.88    | -6.0            | 42.0            | -15.0           |
| EV (positive)       | 3             | 283    | 0.002  | 2.60      | 3.56    | -7.5            | 16.5            | -6.0            |
| EV (positive)       | 2             | 275    | 0.003  | 2.50      | 3.53    | 9.0             | 16.5            | -6.0            |
| EV (positive)       | 1             | 237    | 0.01   | 2.01      | 3.78    | -31.5           | 51.0            | -16.5           |
| EV (negative)       | 3             | 1274   | <0.001 | 11.80     | -3.67   | 6.0             | -27.0           | -1.5            |
| EV (negative)       | 2             | 226    | 0.014  | 1.86      | -3.02   | -15.0           | -75.0           | -10.5           |
| EV (negative)       | 1             | 218    | 0.018  | 1.75      | -3.01   | -18.0           | -76.5           | 3.0             |
| risk (positive)     | 5             | 7344   | <0.001 | 31.00     | 4.67    | -19.5           | -45.0           | 18.0            |
| risk (positive)     | 4             | 1054   | <0.001 | 6.62      | 3.82    | 49.5            | -25.5           | 15.0            |
| risk (positive)     | 3             | 591    | <0.001 | 3.73      | 3.73    | 16.5            | 34.5            | -3.0            |
| risk (positive)     | 2             | 365    | 0.01   | 2.01      | 4.05    | -19.5           | 33.0            | -4.5            |
| risk (positive)     | 1             | 305    | 0.031  | 1.50      | 4.23    | 52.5            | -60.0           | -1.5            |
| risk (negative)     | 7             | 2664   | <0.001 | 14.50     | -4.67   | 30.0            | 24.0            | -9.0            |
| risk (negative)     | 6             | 1300   | <0.001 | 8.05      | -3.83   | 15.0            | 64.5            | -4.5            |
| risk (negative)     | 5             | 1209   | <0.001 | 7.55      | -4.08   | 6.0             | -91.5           | 7.5             |
| risk (negative)     | 4             | 950    | <0.001 | 6.05      | -3.75   | -31.5           | 16.5            | -18.0           |
| risk (negative)     | 3             | 515    | 0.001  | 3.18      | -4.31   | -16.5           | 66.0            | -3.0            |
| risk (negative)     | 2             | 467    | 0.002  | 2.82      | -3.93   | 67.5            | -30.0           | -6.0            |
| risk (negative)     | 1             | 397    | 0.005  | 2.27      | -3.31   | -10.5           | 39.0            | 6.0             |
| RPE (positive)      | 8             | 4234   | <0.001 | 24.10     | 4.44    | 12.0            | 16.5            | -4.5            |
| RPE (positive)      | 7             | 2724   | <0.001 | 17.30     | 4.38    | -10.5           | 18.0            | -12.0           |
| RPE (positive)      | 6             | 526    | <0.001 | 4.04      | 3.70    | -27.0           | -25.5           | 13.5            |
| RPE (positive)      | 5             | 506    | <0.001 | 3.87      | 3.59    | 40.5            | 55.5            | -10.5           |
| RPE (positive)      | 4             | 398    | 0.001  | 2.91      | 4.30    | -42.0           | 48.0            | -15.0           |
| RPE (positive)      | 3             | 390    | 0.001  | 2.84      | 3.64    | 12.0            | -25.5           | -10.5           |
| RPE (positive)      | 2             | 314    | 0.008  | 2.11      | 3.96    | 63.0            | -25.5           | 22.5            |
| RPE (positive)      | 1             | 273    | 0.02   | 1.69      | 3.81    | 16.5            | -54.0           | 25.5            |
| surprise (positive) | 4             | 1026   | <0.001 | 9.89      | 4.33    | 57.0            | 22.5            | 6.0             |
| surprise (positive) | 3             | 871    | <0.001 | 8.58      | 4.41    | 51.0            | -33.0           | 0.0             |
| surprise (positive) | 2             | 464    | <0.001 | 4.70      | 3.73    | -58.5           | -25.5           | -6.0            |
| surprise (positive) | 1             | 328    | 0.001  | 3.16      | 3.54    | 54.0            | 13.5            | -21.0           |
| surprise (negative) | 3             | 1291   | <0.001 | 12.00     | -4.04   | -22.5           | -54.0           | 7.5             |
| surprise (negative) | 2             | 635    | <0.001 | 6.45      | -4.16   | 10.5            | -51.0           | 13.5            |
| surprise (negative) | 1             | 250    | 0.007  | 2.18      | -3.31   | 48.0            | 0.0             | 12.0            |

*Note.* Clusters surviving thresholding. We report the number of voxels, cluster probability, log probability, activation and MNI coordinate of the activation peak voxel in a cluster.

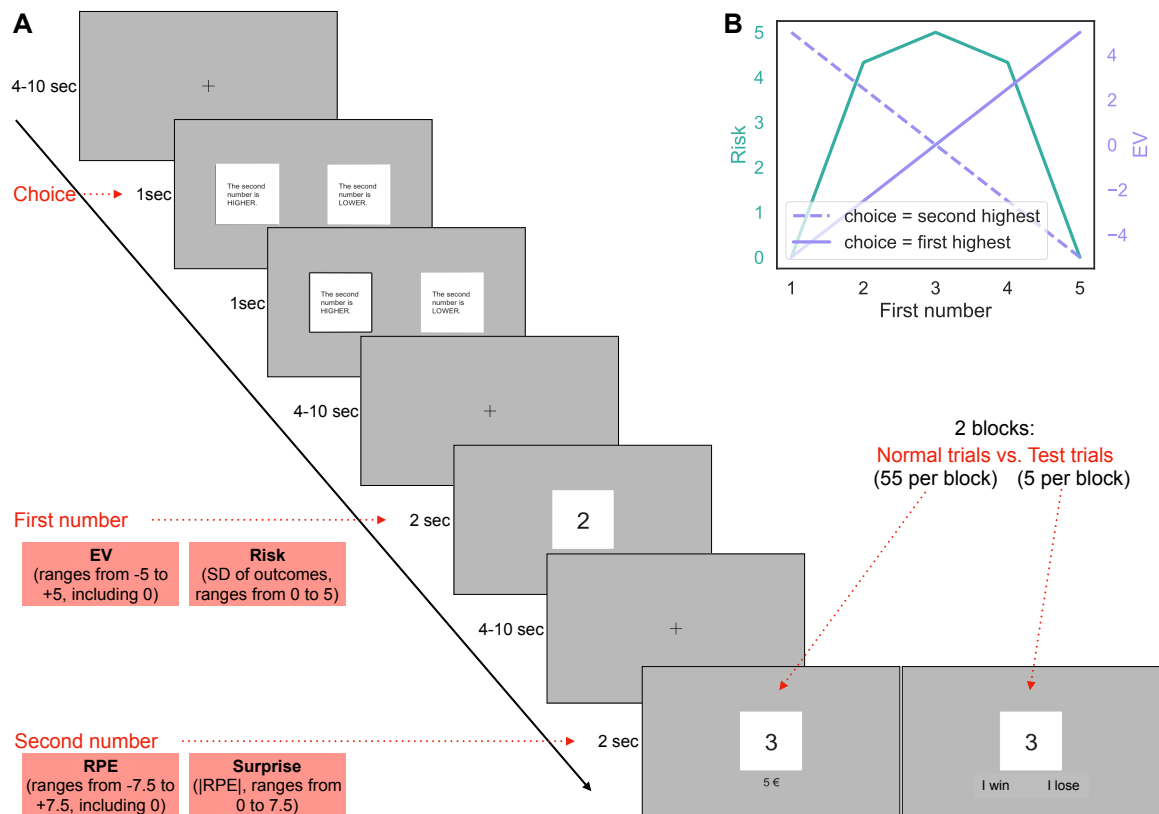

*Figure 1.* Experimental design. **A.** Example of a single trial. Between each event and at the beginning of each trial, a fixation cross is presented for a period of time between 4 and 10 seconds. A bet has to be placed within 1 second, and a rectangle is drawn around the corresponding choice for 1 more second. The first number is then shown for 2 seconds: In this example, the expected reward is 2.5 euros, and the risk is 4.3. Finally, the second number is shown for 2 seconds: In this case, both the reward prediction error and the surprise are 2.5. In test trials (approximately 8%) participants have to specify whether they won or lost. **B.** Relationship between risk and expected reward when the first number is shown, depending on the choice.

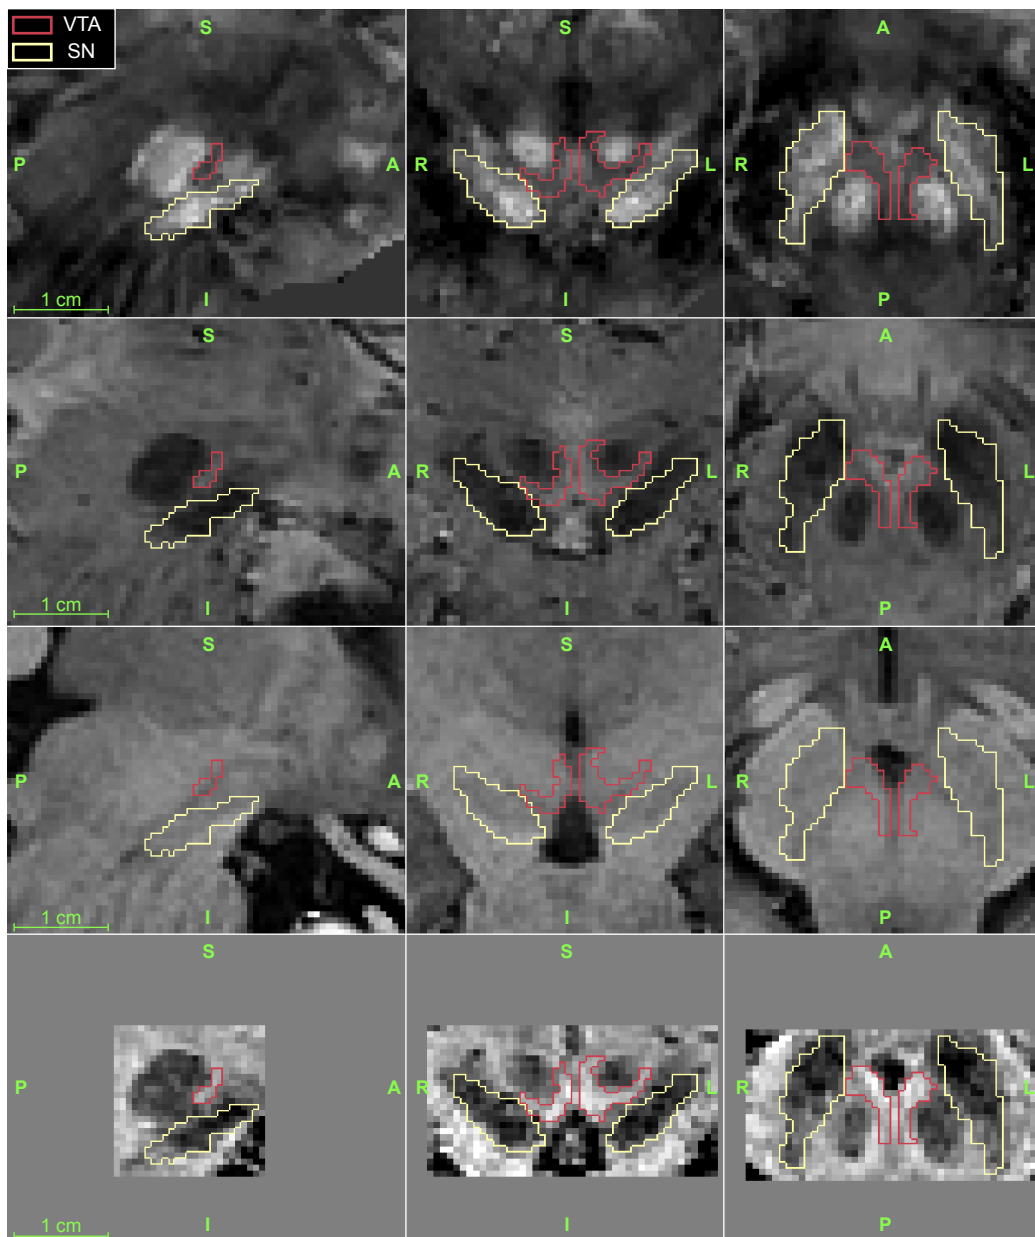

*Figure 2.* Detail of the midbrain area of one participant in the sagittal (first column), coronal (second column), and axial (third column) planes. The first row is the QSM image, used for SN segmentation. The second and third row are, respectively, the average between the third and fourth echo of the  $T_2^*$ -weighted, and the  $T_1$ -weighted images. To obtain the image in fourth row, the images in the second and third row were normalized within the midbrain area (the non-homogeneous grey area in the last row) and then summed. This image was used for VTA segmentation, as it shows a contrast of both iron-rich nuclei and of the CSF.

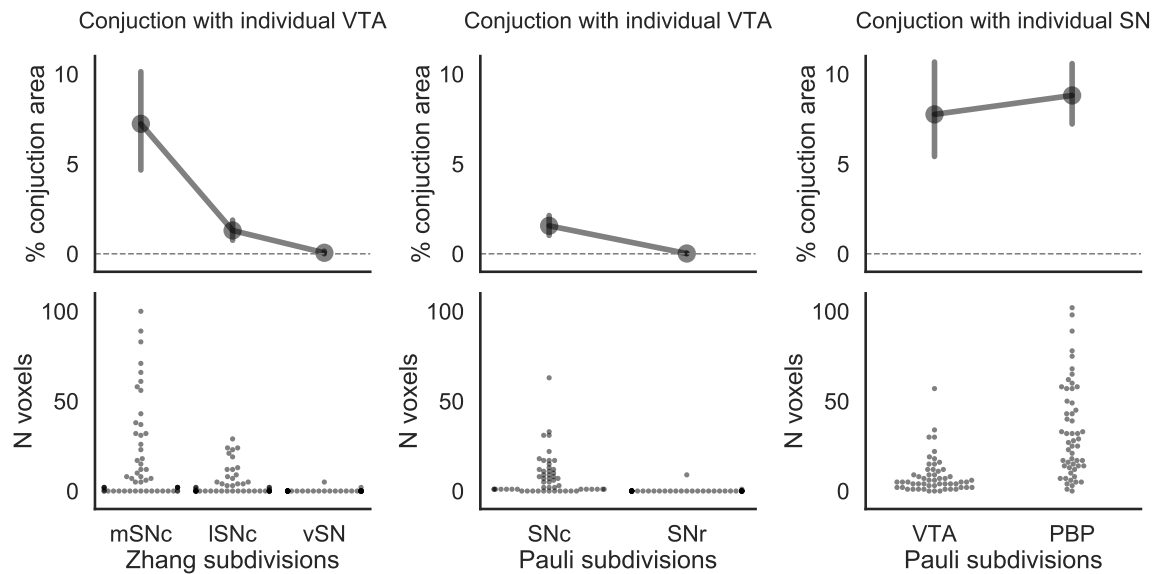

*Figure 3.* Conjunction between the population-defined substantia nigra (SN) and ventral tegmental area (VTA) subdivisions and, respectively, individually defined VTA and SN segmentation. The SN subdivisions were taken from either Zhang et al. (2017) or Pauli et al. (2018) studies, while the VTA subdivisions were taken from Pauli et al. (2018) study. Top row: percentage of the conjunction area over the subdivision area. Dots represent mean across subjects, while error bars represent 95% confidence intervals. Bottom row: swarmplot showing the number of voxels in the conjunction per subject. The medial parts of the SN (mSNc, and SNc) overlap more with the VTA than the lateral and ventral parts of the SN (ISNc, vSN, and SNr). Both the ventral (VTA) and lateral (PBP) parts of the VTA overlap with the SN.



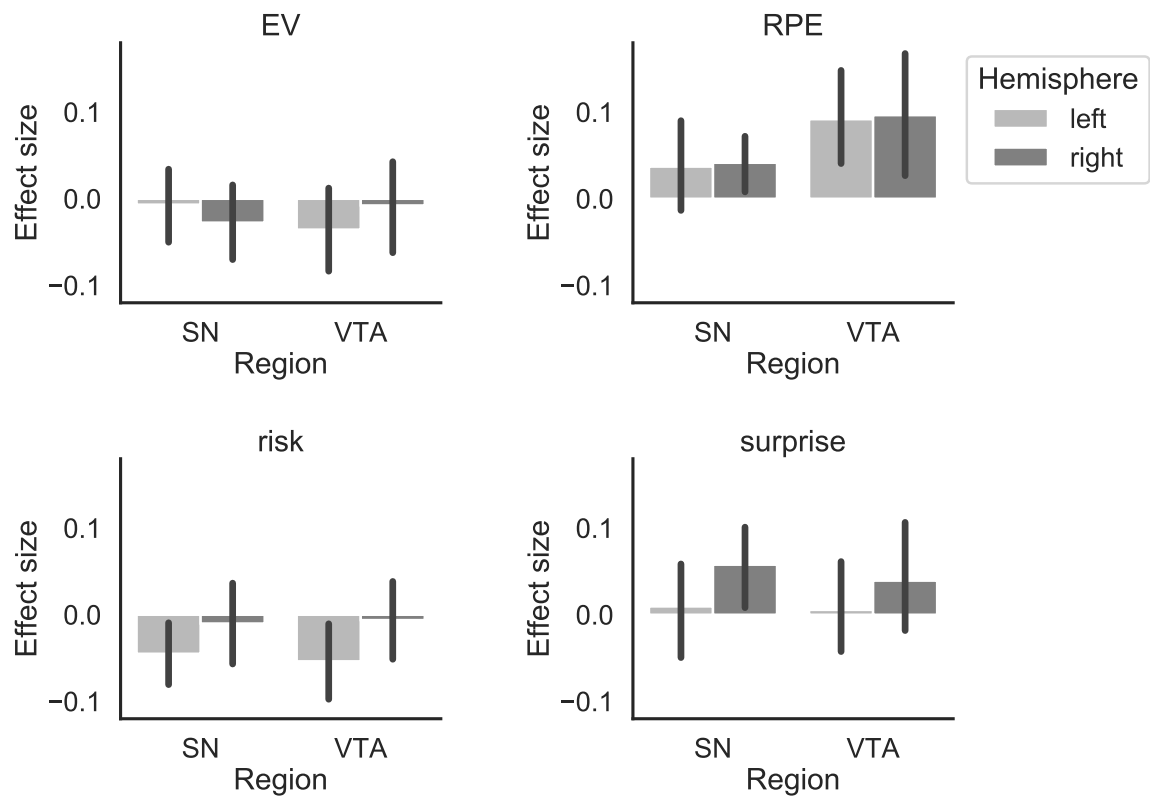

Figure 4. Average effect size across participants of the GLM on the time-series data extracted from the regions of interest (ROI): left and right substantia nigra (SN) and left and right ventral tegmental area (VTA). Different plots represent the predictors of main interest: expected value (EV) and expected risk (estimated when the trials' first number is presented), and reward prediction error (RPE) and surprise (estimated when the trial's reward or punishment are presented). Error bars represent 95% confidence intervals.

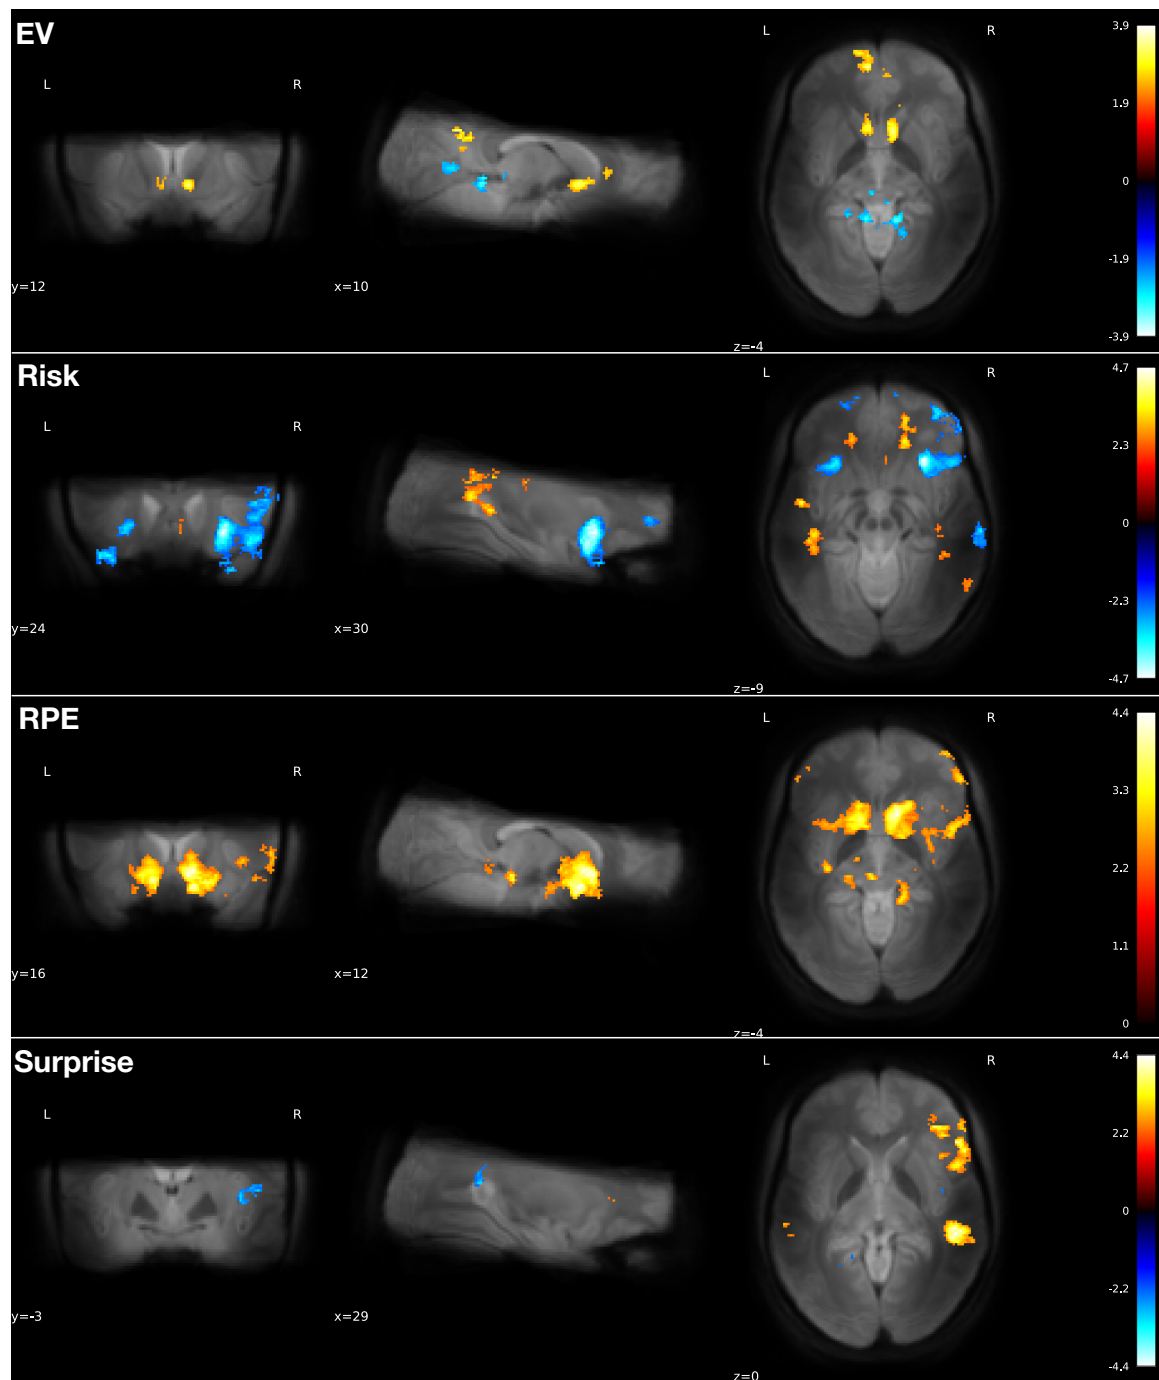

Figure 5. Results of the voxel-wise GLM after cluster correction, and overlapped onto the mean functional image across participants and volumes. Each row corresponds to the predictors of main interest: expected value (EV) and expected risk (estimated when the trials' first number is presented), and reward prediction error (RPE) and surprise (estimated when the trial's reward or punishment are presented).
